# Supplementary material
Source: PubMed Central journal article supplement (PMC8068605)

Full membranes of the representative blot presented as nNOS (Figure 2C)

Membrane A

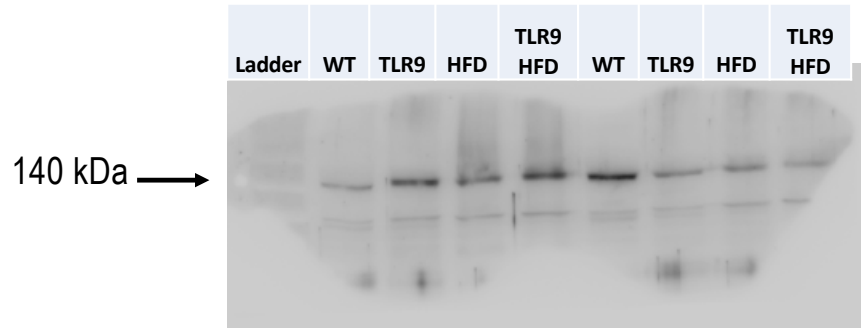

Membrane B

nNOS

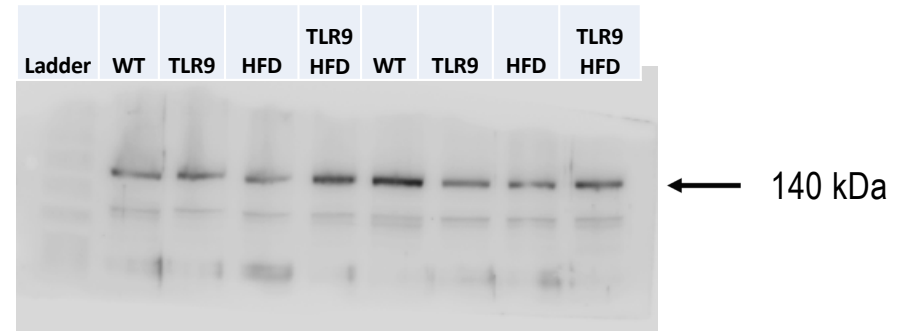

Membrane A

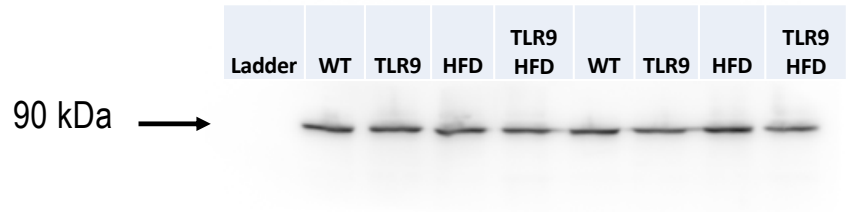

HSP-90

Membrane B

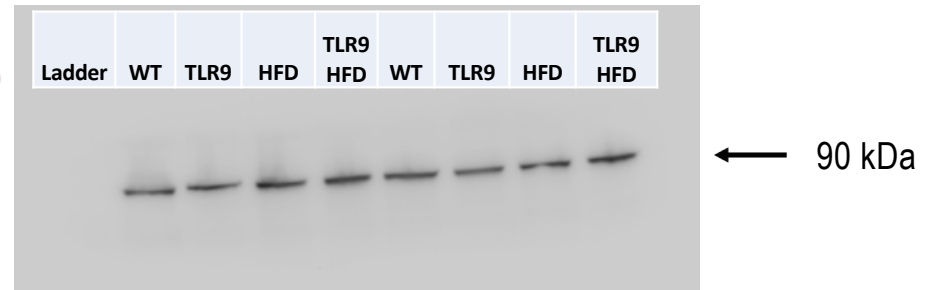

Full membranes of the representative blot presented as TNF-a (Figure 3A)

**TNF-a/ $\beta$ -actin**

**Membrane A**

**Membrane B**

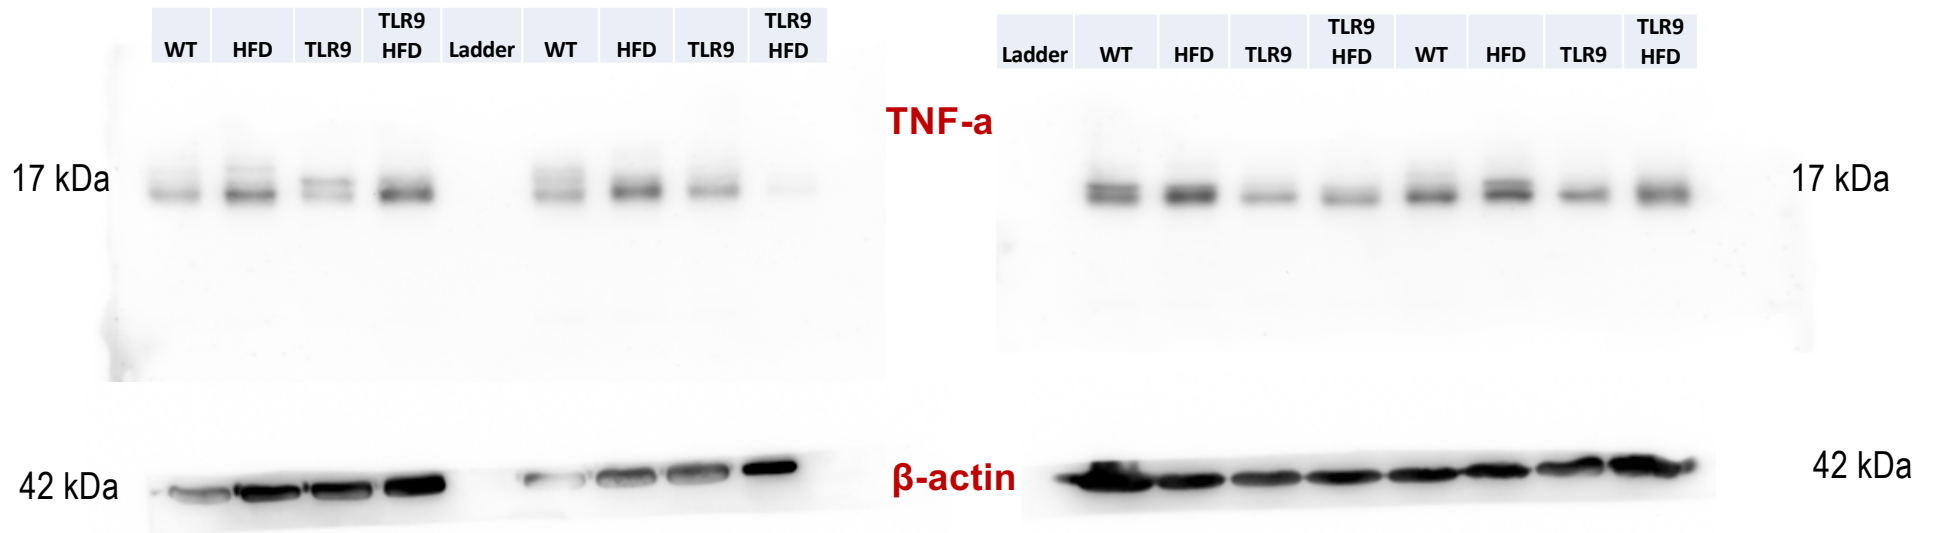

Full membranes of the representative blot presented as TNF-R1 (Figure 3B)

TNF-R1/ $\beta$ -actin

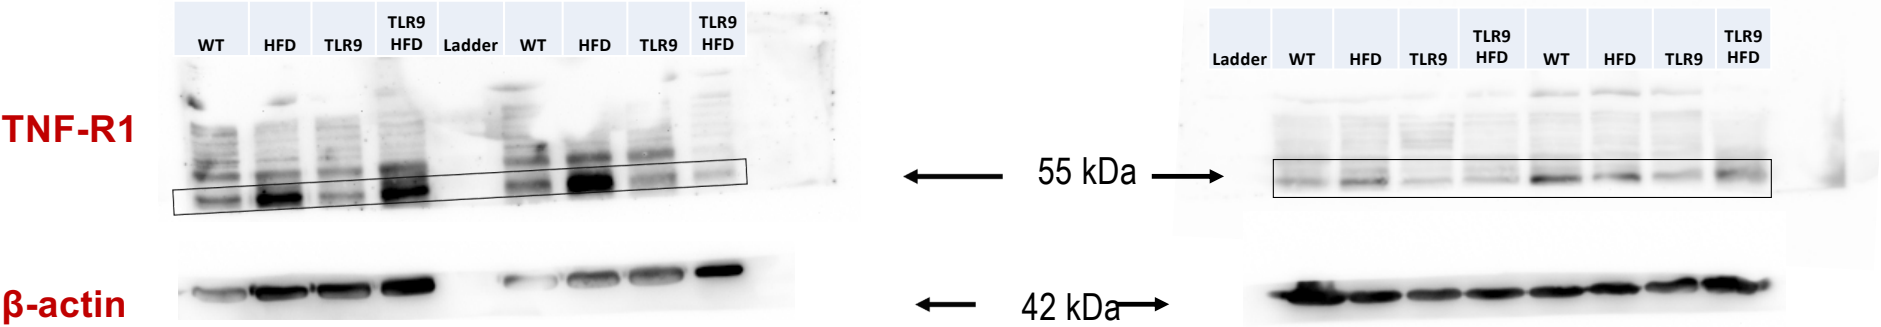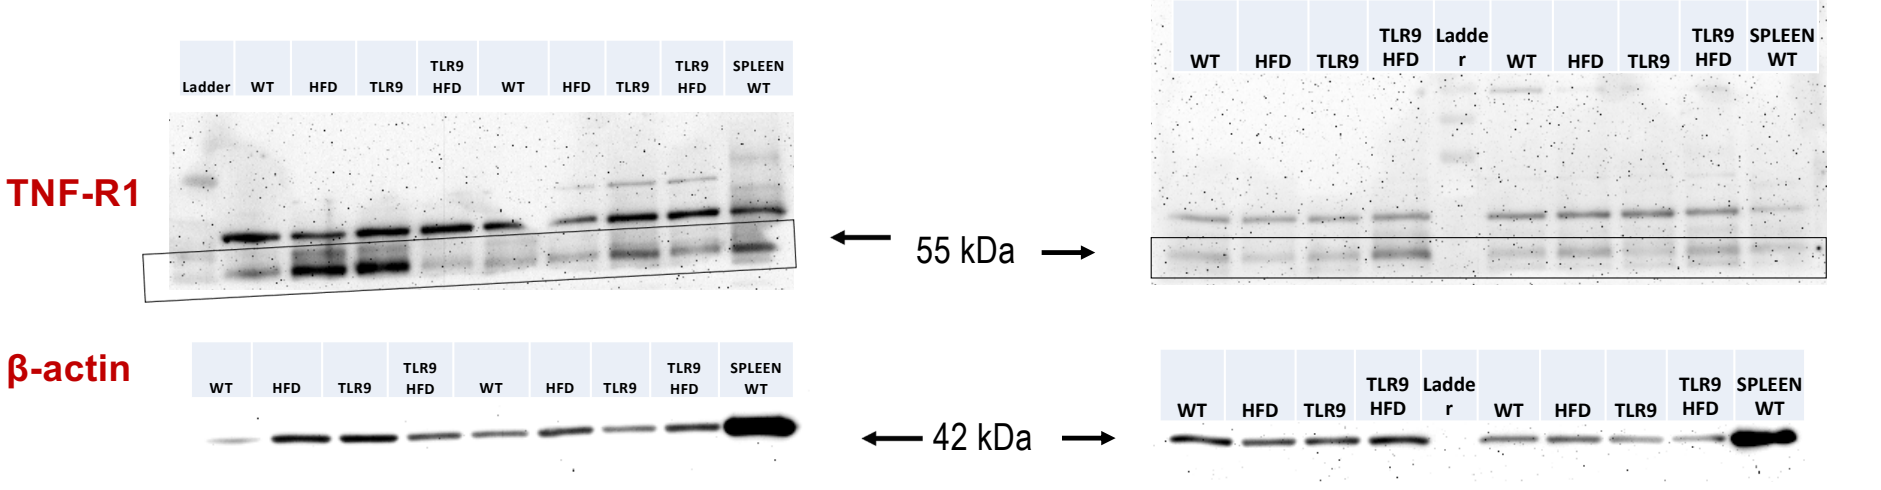

Full membranes of the representative blot presented as TLR9 (Figure 4A)

**TLR9/ $\beta$ -actin**

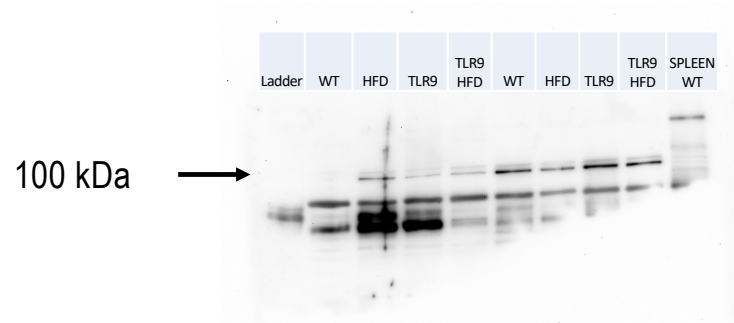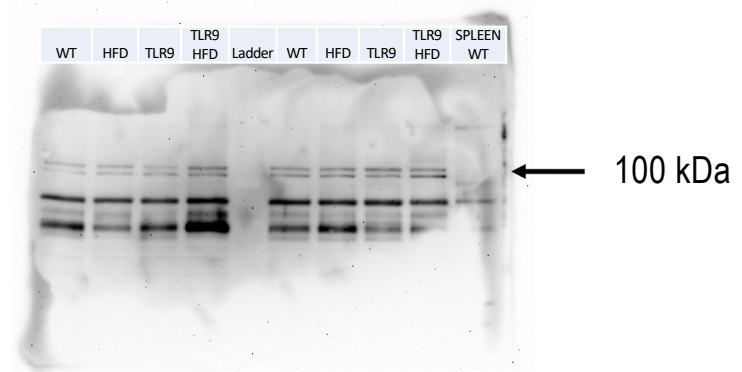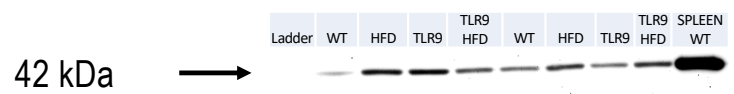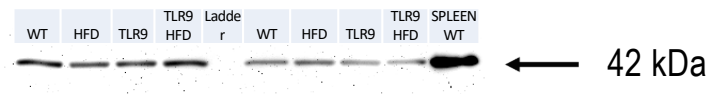

Full membranes of the representative blot presented as MyD88 (Figure 4B)

**MYD-88/ $\beta$ -actin**

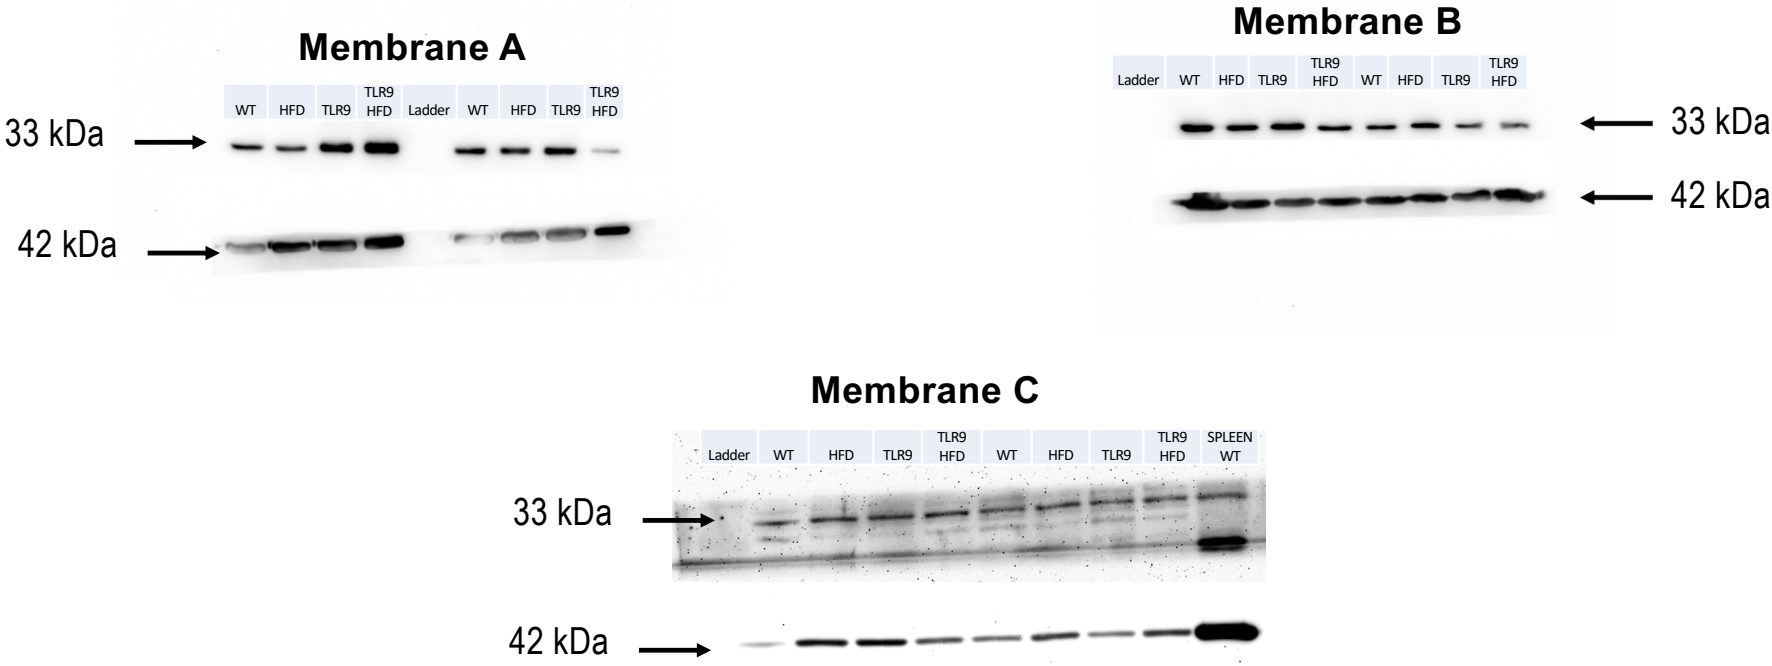

Supplement: NIHMS1668455-supplement-1.pdf [file NIHMS1668455-supplement-1.pdf]
